# Supplementary material for: Effect of Sex and Cross-Sex Hormone Treatment on Renal Monocarboxylate-Transporter Expression in Rats
Source: MDPI journal article supplement (doi:10.3390/pharmaceutics15102404), 2023-09-29

## MCT1

OVX Estrogen, OVX Estrogen Placebo

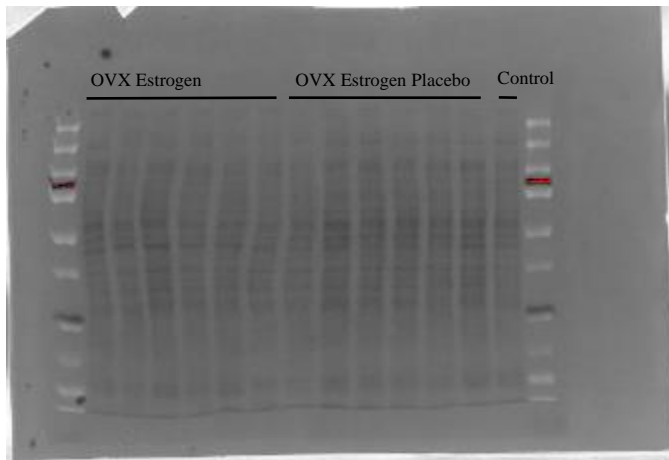

CST Estrogen, CST Estrogen Placebo

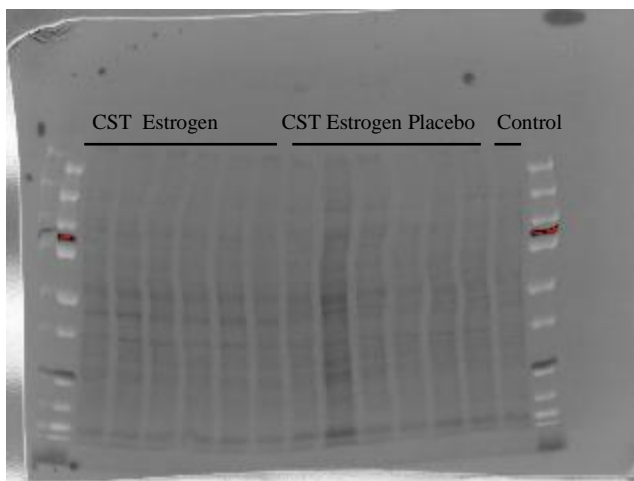

OVX Progesterone, OVX Progesterone Placebo

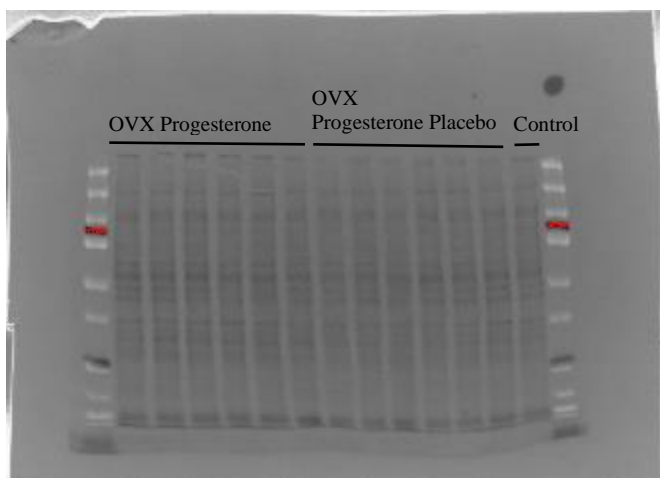

CST Progesterone, CST Progesterone Placebo

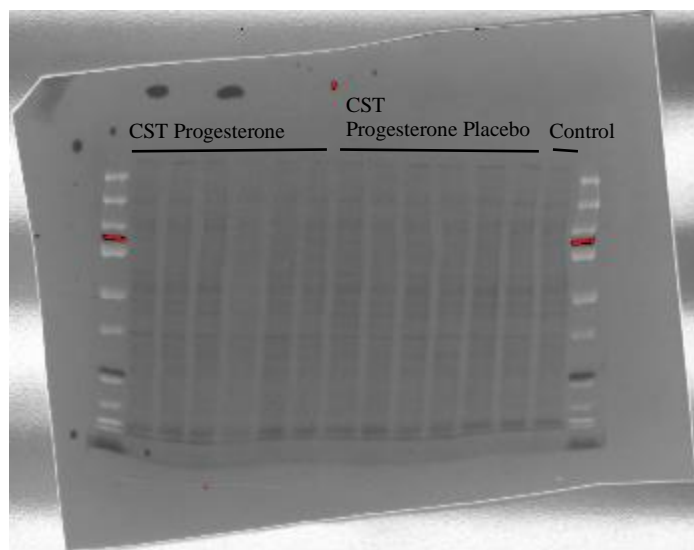

OVX Combo, OVX Combo Placebo

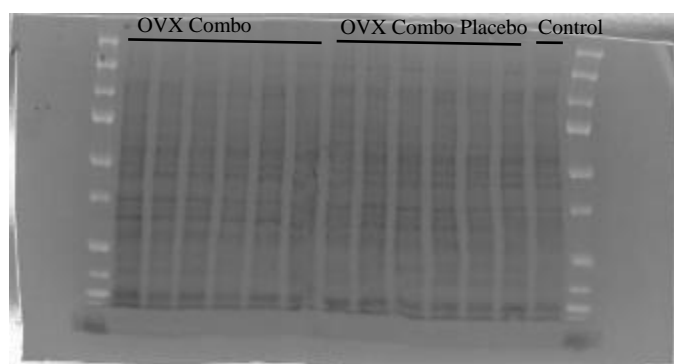

CST Combo, CST Combo Placebo

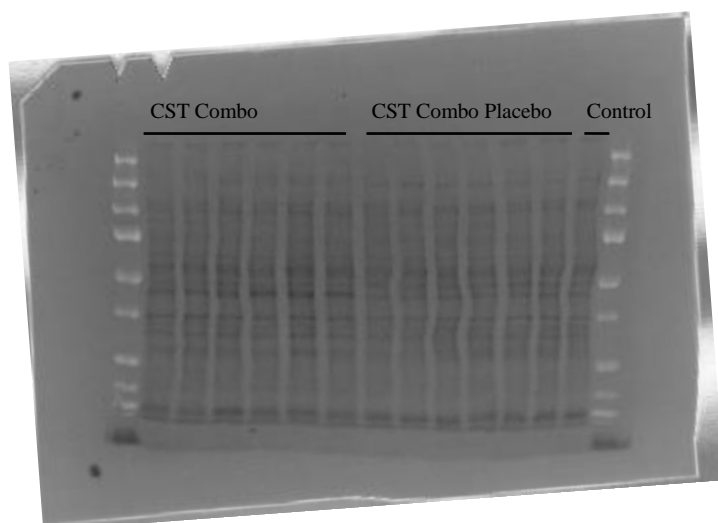

## OVX Testosterone, OVX Testosterone Placebo

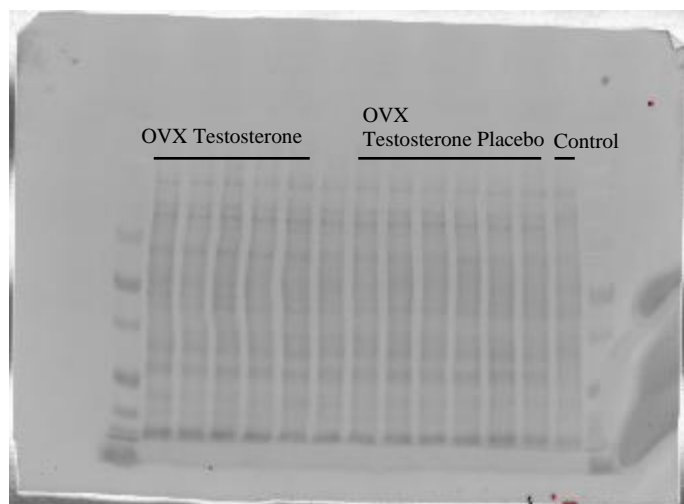

## CST Testosterone, CST Testosterone Placebo

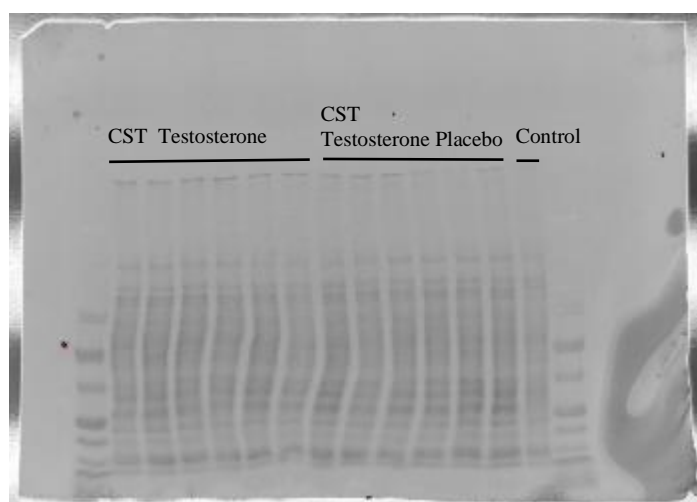

## Male, Female

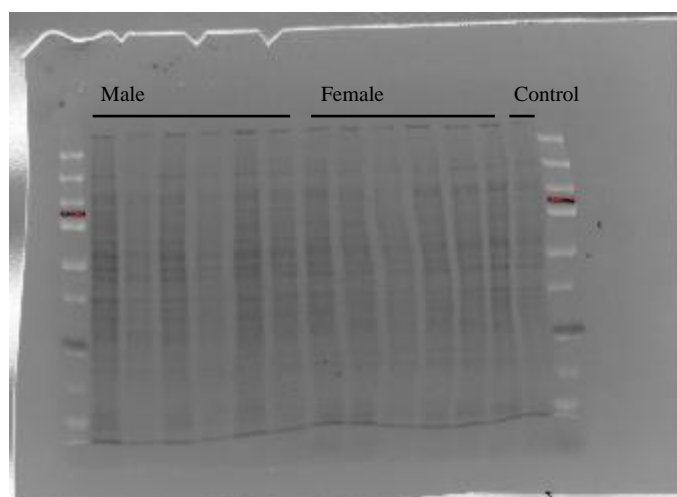

## MCT4

OVX Estrogen, OVX Estrogen Placebo

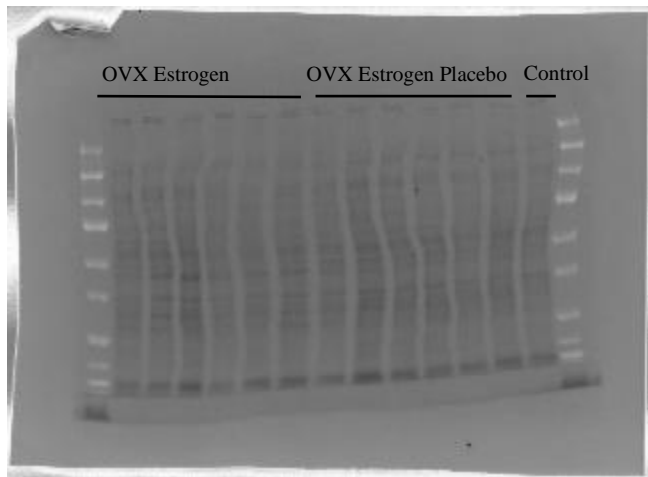

CST Estrogen, CST Estrogen Placebo

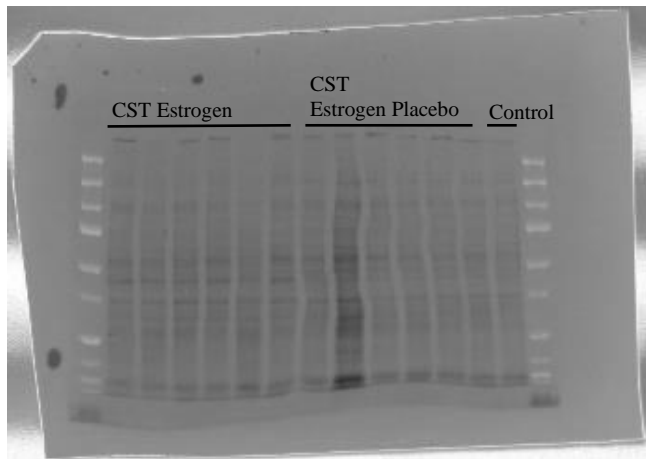

OVX Progesterone, OVX Progesterone Placebo

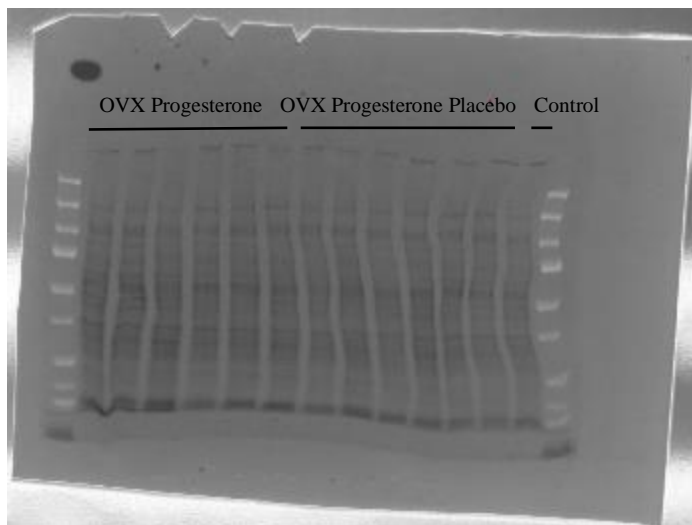

CST Progesterone, CST Progesterone Placebo

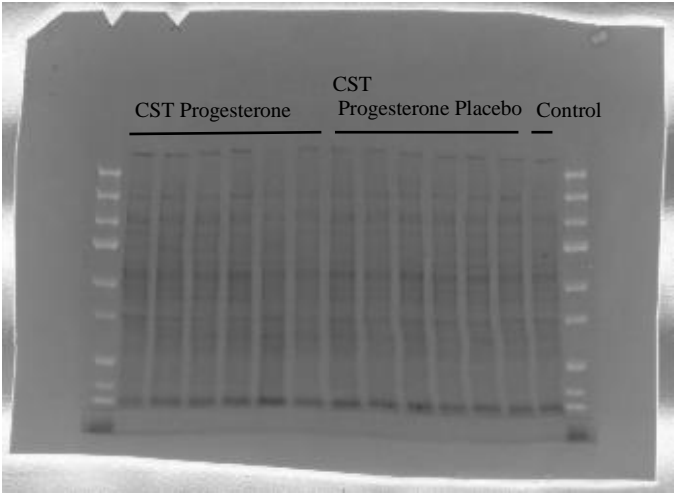

OVX Combo, OVX Combo Placebo

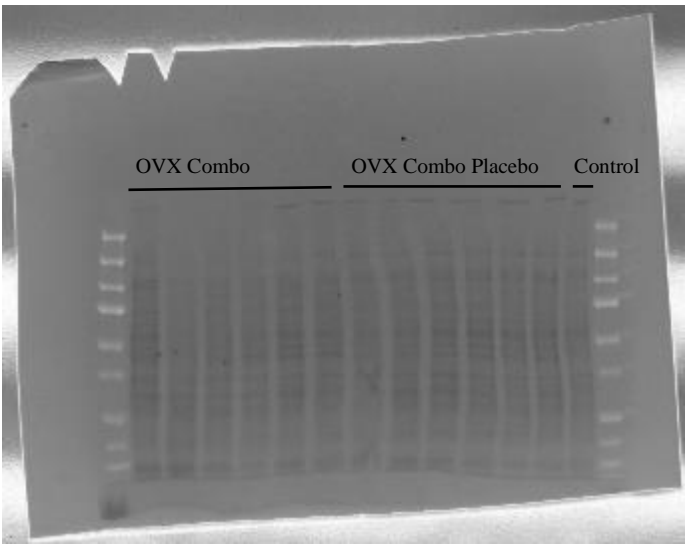

CST Combo, CST Combo Placebo

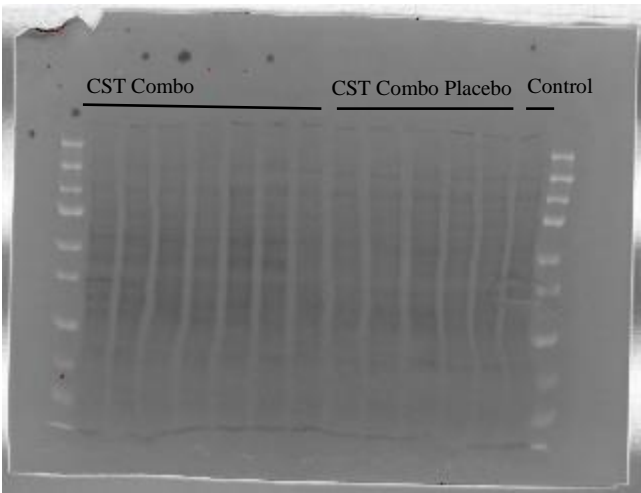

## OVX Testosterone, OVX Testosterone Placebo

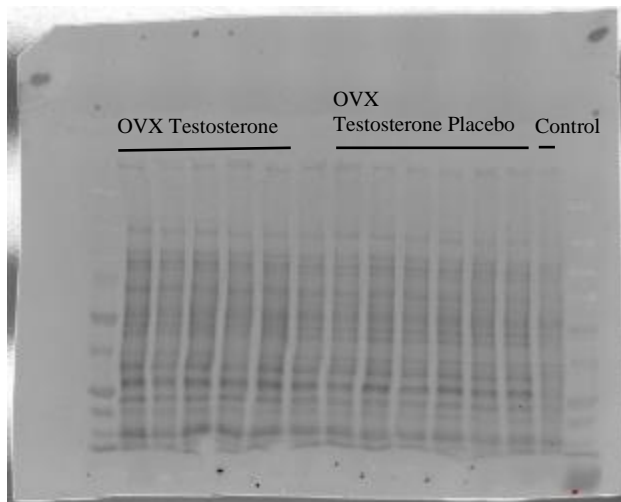

## CST Testosterone, CST Testosterone Placebo

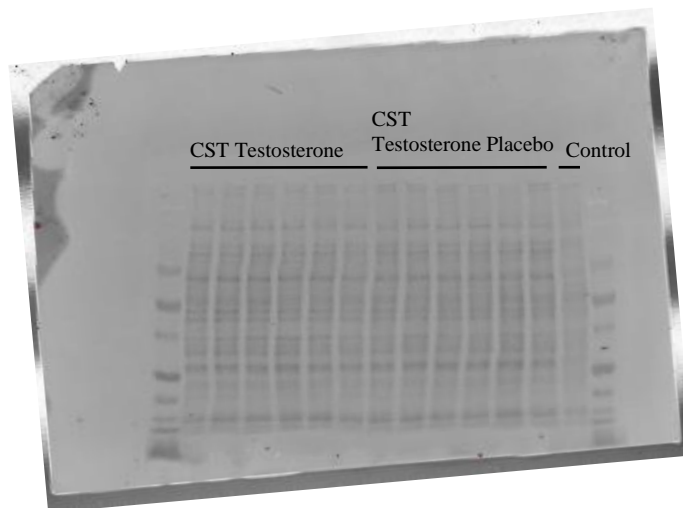

## Male, Female

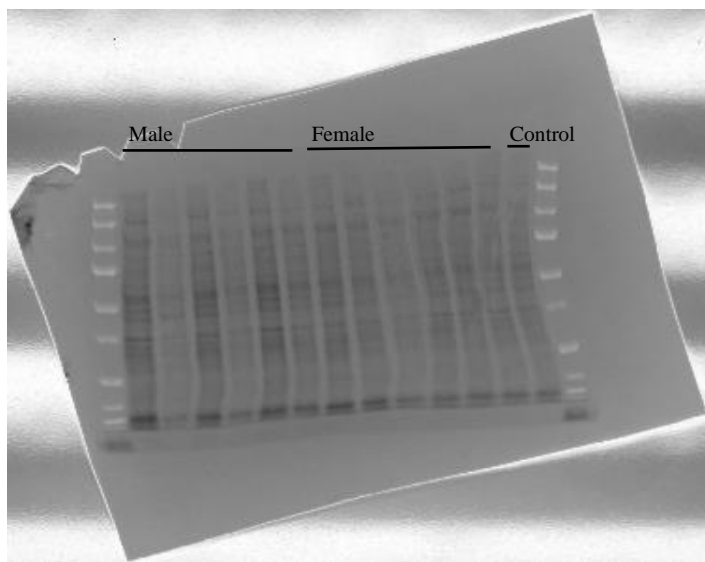

## **CD147**

OVX Estrogen, OVX Estrogen Placebo

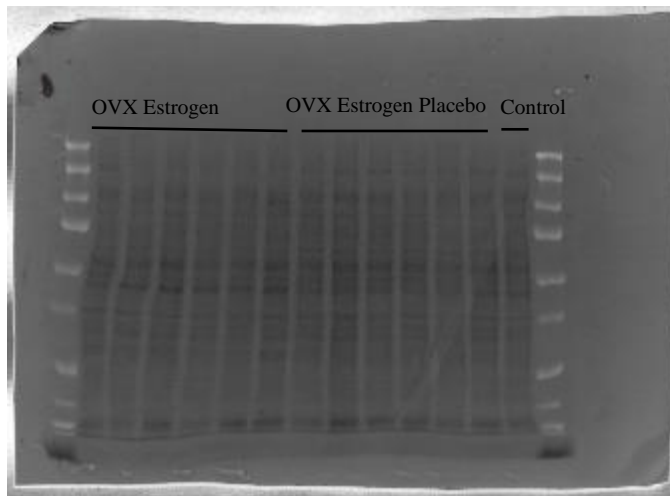

CST Estrogen, CST Estrogen Placebo

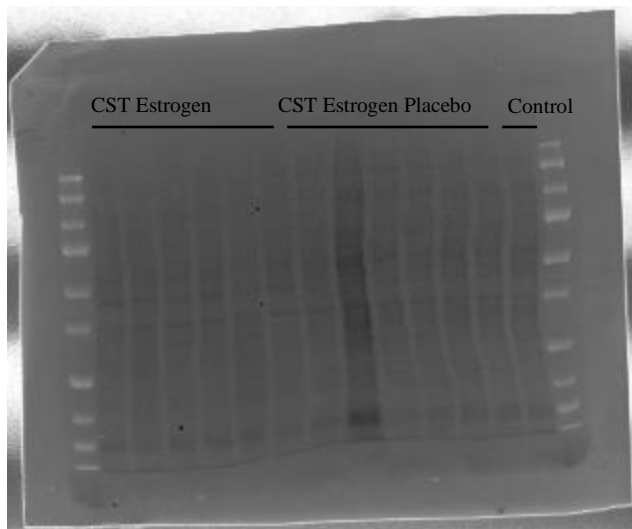

OVX Progesterone, OVX Progesterone Placebo

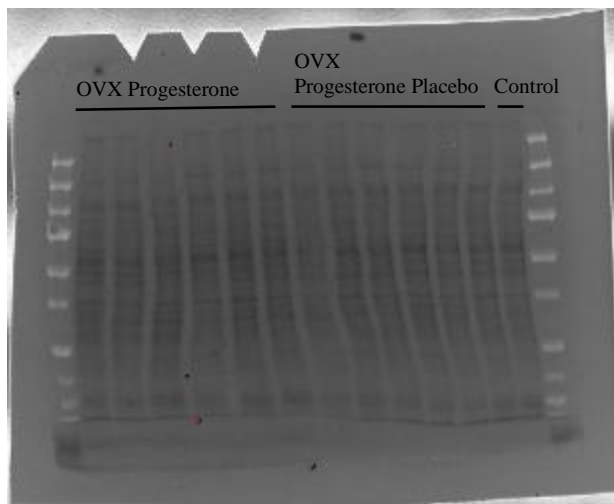

CST Progesterone, CST Progesterone Placebo

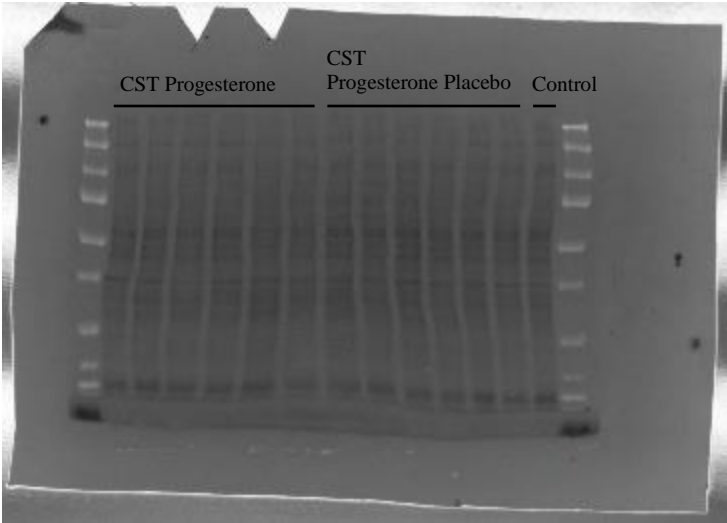

OVX Combo, OVX Combo Placebo

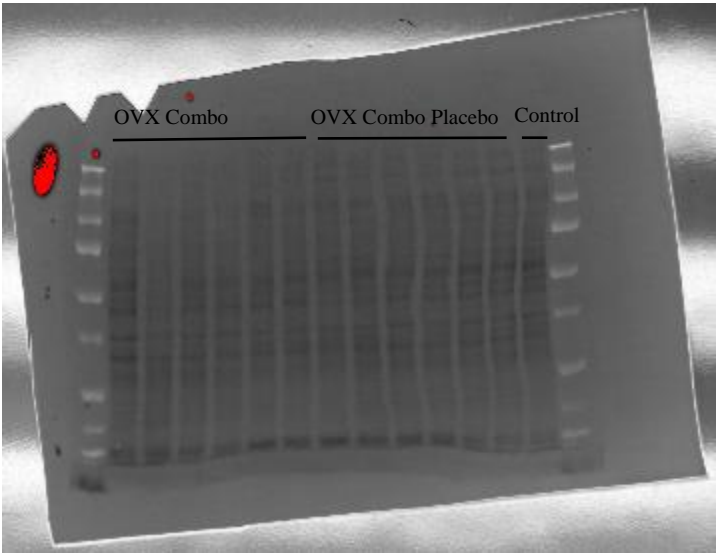

CST Combo, CST Combo Placebo

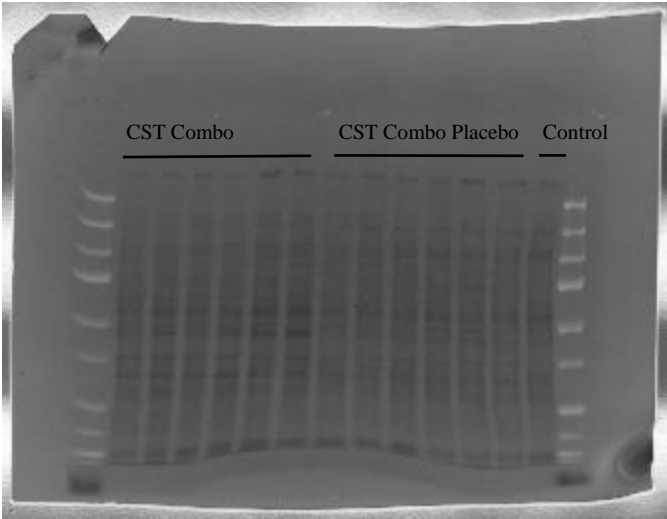



## OVX Testosterone, OVX Testosterone Placebo

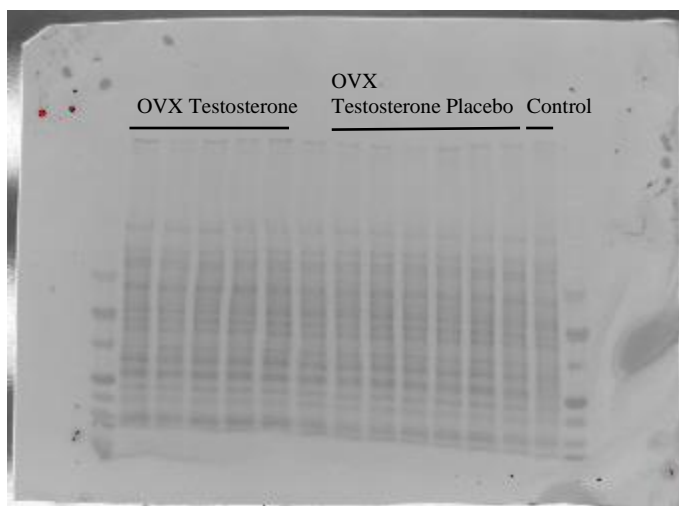

## CST Testosterone, CST Testosterone Placebo

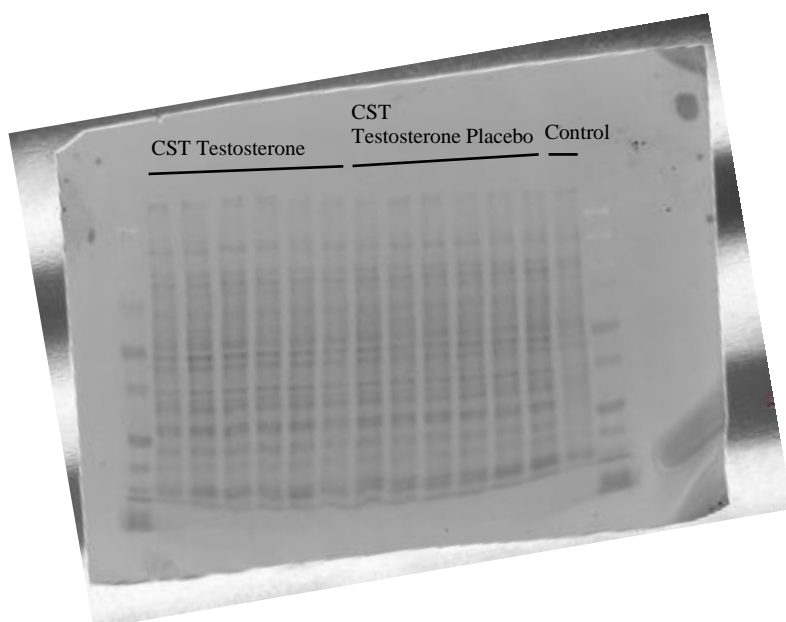

## Male, Female

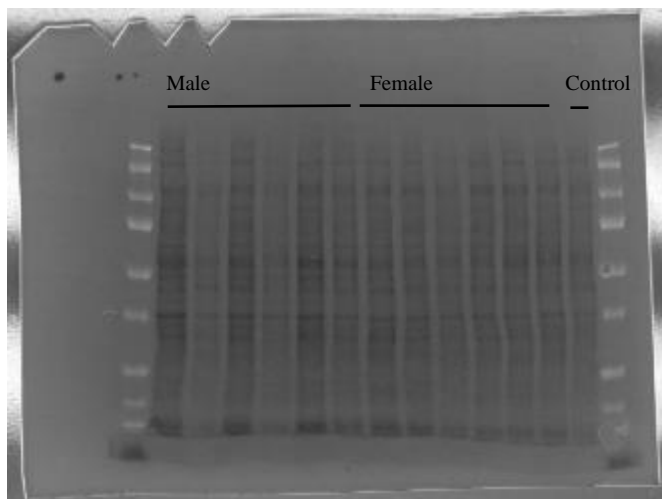

## SMCT1

OVX Estrogen, OVX Estrogen Placebo

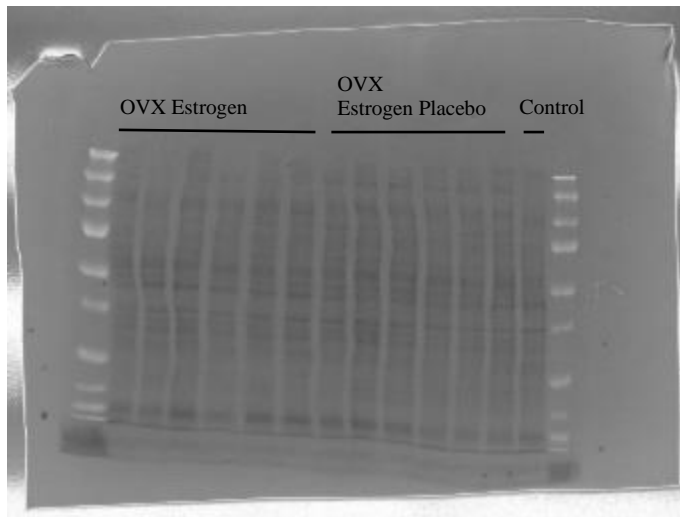

CST Estrogen, CST Estrogen Placebo

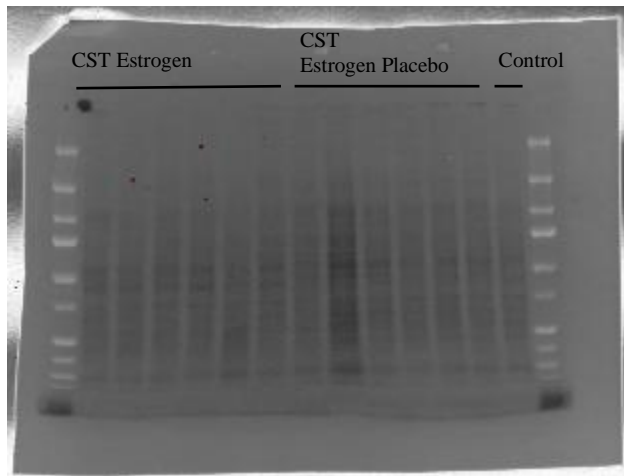

OVX Progesterone, OVX Progesterone Placebo

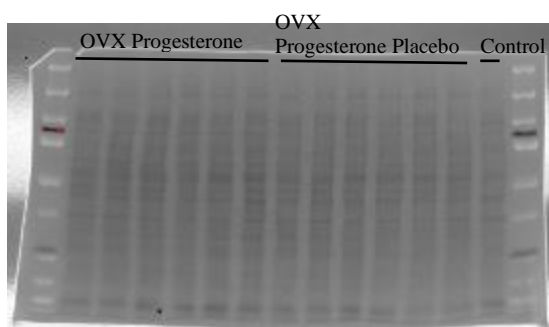

## CST Progesterone, CST Progesterone Placebo

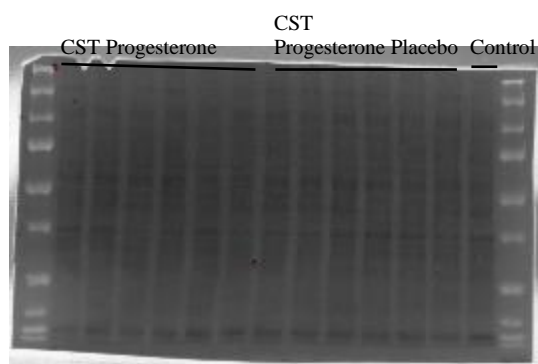

## OVX Combo, OVX Combo Placebo

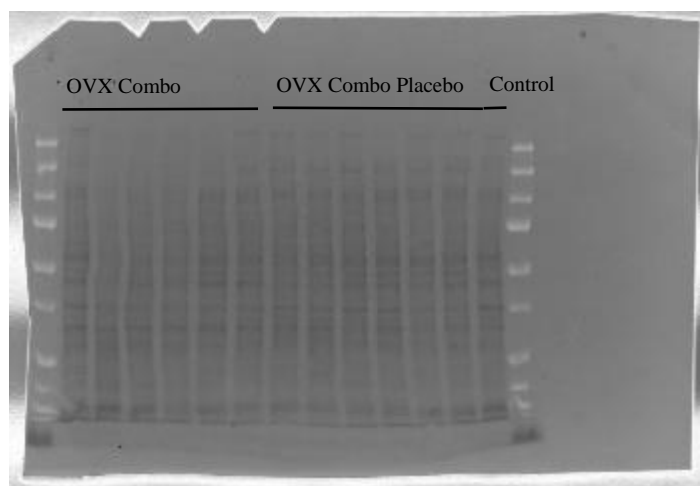

## CST Combo, CST Combo Placebo

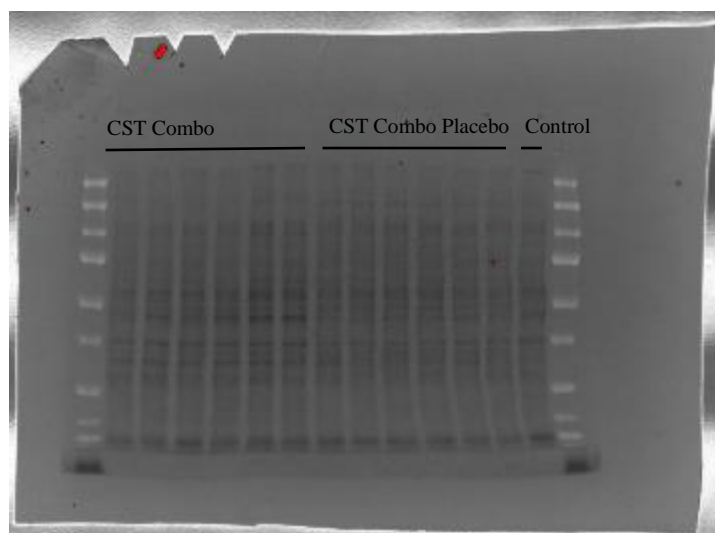

## OVX Testosterone, OVX Testosterone Placebo

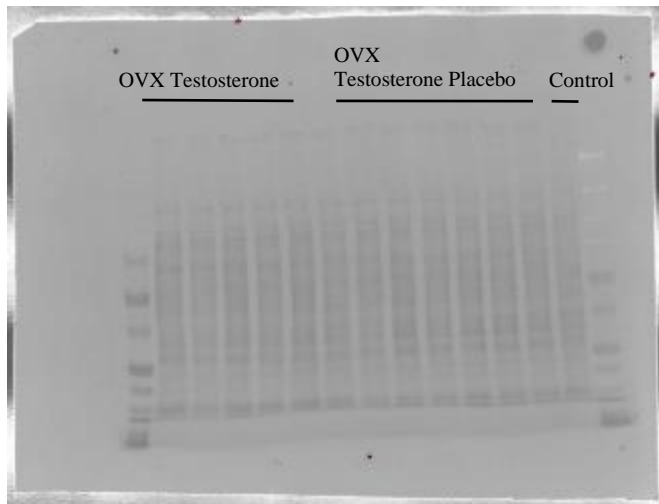

## CST Testosterone, CST Testosterone Placebo

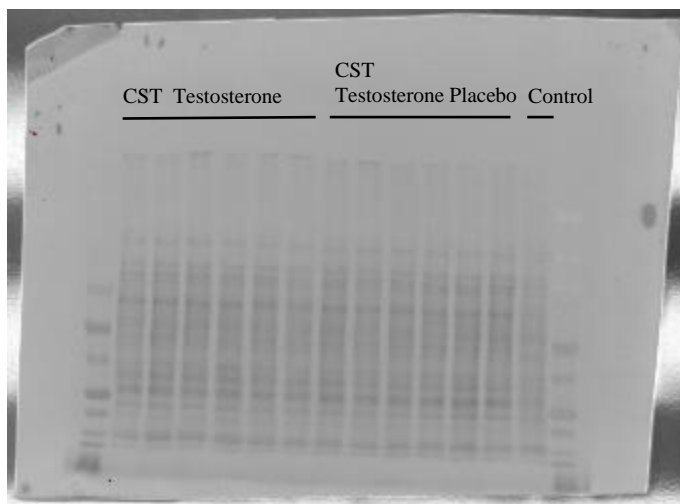

## Male, Female

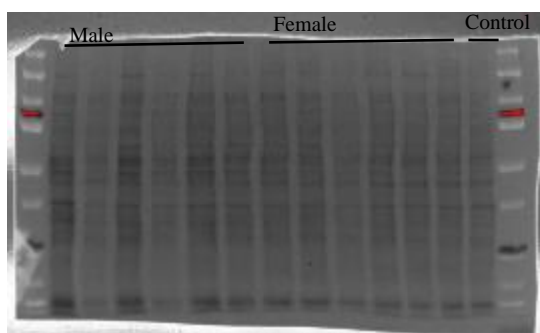

Supplement: s1 [file s1]
